# Supplementary material
Source: Research Square preprint supplement (doi:10.21203/rs.3.rs-9005834/v1)
Supplement: Supplementary file 1 [file 190c27097123160bd99cbbf0.docx]

# Declaration of Interest Statement

Declaration of Interest Statement：

We declare that we do not have financial and personal relations that are improper to others or organizations, which will affect our work. There is no professional or any other nature of personal interests or in any product, service and / or company may be considered as the position of influence. And all authors declare that No conflict of interest exists.
