# Supplementary material
Source: Research Square preprint supplement (doi:10.21203/rs.3.rs-9005834/v1)
Supplement: Supplementary file 3 [file bbcd26df13de7f42c23b4eca.docx]

**Highlights**

- This study optimized the preparation conditions of acid-modified corn cob-based activated carbon (CCACM) through orthogonal experiments and systematically analyzed its structural characteristics and methylene blue (MB) adsorption performance.
- The adsorption properties of activated carbon for MB were investigated, focusing on the effects of adsorption time and temperature on adsorption efficiency. The kinetic study revealed the characteristics of the adsorption process, indicating that the quasi-second order kinetic model more accurately describes the adsorption behavior.
- This study not only provides an effective approach for removing organic dyes from industrial wastewater but also lays atheoretical foundation and offers practical guidance for further exploring and optimizing the adsorption performance of biomass-based activated carbons.

.
