# Supplementary material
Source: Research Square preprint supplement (doi:10.21203/rs.3.rs-9005834/v1)

**
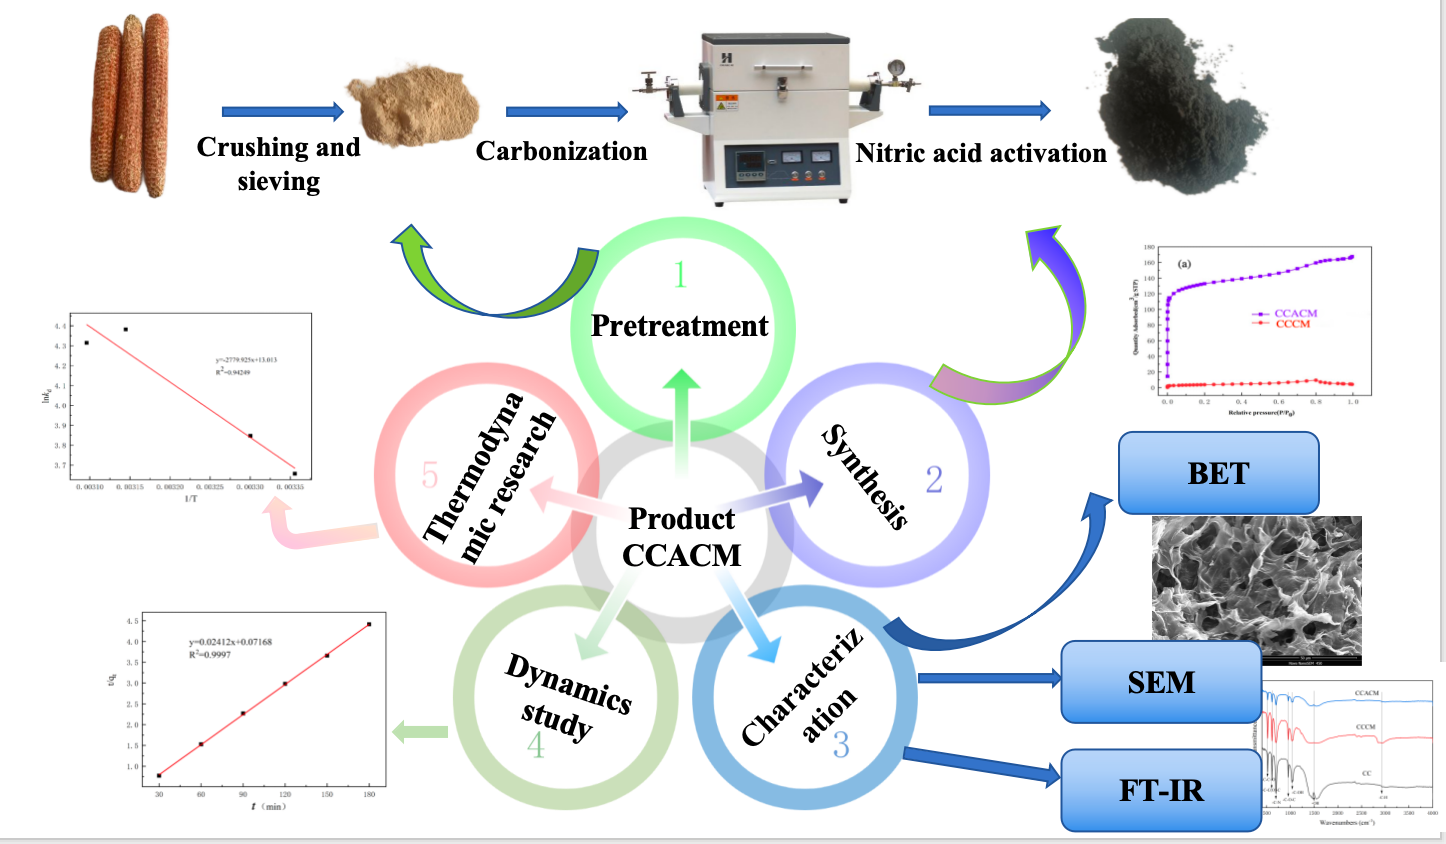
**

Supplement: Supplementary file 2 [file 9924a30786f1686f15be0204.docx]
